# Supplementary material
Source: publisher site journal article supplement (https://www.dovepress.com/article/437794)
Supplement: Supplementary file 1 [file get_supplementary_file.php]

| **Variable** | **Group A** | **Group B** | **p value** |
| --- | --- | --- | --- |
| **P level on trigger day (ng/mL)** | **≤1.5** | **＞1.5** |
| **Cases (n)** | 126 | 63 |  |
| **Age (y)** | 30.1 ± 3.9 | 30.5 ± 3.6 | 0.52 |
| **BMI (kg/m2)** | 22.29 ± 2.86 | 22.45 ± 2.80 | 0.71 |
| **Basal FSH (mIU/mL)** | 7.95 ± 2.17 | 7.79 ± 1.85 | 0.61 |
| **AFC (n)** | 13.1 ± 4.4 | 13.2 ± 4.0 | 0.94 |
| **Total Gn dose (IU)** | 1936.6 ± 531.2 | 1880.8 ± 571.0 | 0.50 |
| **Gn duration (d)** | 9.4 ± 1.4 | 9.3 ± 1.4 | 0.76 |
| **P level on trigger day (ng/mL)** | 0.60 ± 0.32 | 1.77 ± 0.21 | <0.01 |
| **Endometrial thickness (mm)** | 11.99 ± 2.24 | 11.47 ± 2.35 | 0.14 |
| **P level after trigger day (ng/mL)** | 5.28 ± 3.76 | 6.85 ± 4.18 | <0.01 |
| **Number of oocytes retrieved (n)** | 11.0 ± 4.0 | 11.4 ± 3.6 | 0.52 |
| **Number of total embryos (n)** | 4.9 ± 2.5 | 5.1 ± 2.8 | 0.53 |
| **Number of transferred embryos (n)** | 1.63 ± 0.49 | 1.63 ± 0.48 | 0.28 |
| **Types of embryos transferred** |  |  | 0.99 |
| **Cleavage-stage embryo (n)** | 109 (86.5%) | 54 (85.7%) |  |
| **Blastocyst (n)** | 17 (13.5%) | 9 (14.3%) |  |
| **Embryo implantation rate (%)** | 62.9 (122/194) | 56.2 (59/105) | 0.31 |
| **Clinical pregnancy rate (%)** | 69.8 (88/126) | 69.8 (44/63) | 0.99 |
| **Early miscarriage rate (%)** | 5.7 (5/88) | 4.5 (2/44) | 0.99 |
| **Live birth rate (%)** | 59.5 (75/126) | 61.9 (39/63) | 0.87 |

**Table S1.** Characteristics of patients with different serum P levels (1.5 ng/mL) on the hCG day after propensity Score matching.

P, progesterone; BMI, body mass index; FSH, follicle-stimulating hormone; AFC, antral follicle count; Gn, gonadotropin.

**Table S2.** Effect modification of P levels on the hCG day on CPR of blastocyst transfer in different P groups.

|  | **P level on the hCG day**  **≤ 0.7 ng/mL** | | | **P for interaction** | **P level on the hCG day**  **> 0.7 ng/mL** | | | **P for interaction** |
| --- | --- | --- | --- | --- | --- | --- | --- | --- |
| **OR** | **95%CI** | **P value** | **OR** | **95%CI** | **P value** |
| **Crude** | 0.248 | 0.02-2.70 | 0.25 | 0.47 | 0.595 | 0.76-1.24 | 0.44 | 0.09 |
| **Adjusted** | 0.384 | 0.03-2.88 | 0.45 | 0.75 | 0.739 | 0.72-0.97 | 0.05 | 0.03 |

**Adjust for:** Age; BMI; Basal FSH; AFC; Endometrial thickness; Number of transferred embryos.

P, progesterone; CPR, clinical pregnancy rate; BMI, body mass index; FSH, follicle-stimulating hormone; AFC, antral follicle count.
